# Supplementary material for: miR-133a function in the pathogenesis of dedifferentiated liposarcoma
Source: PubMed Central journal article supplement (PMC6019219; doi:10.1186/s12935-018-0583-2), 2018-06-26

**a**

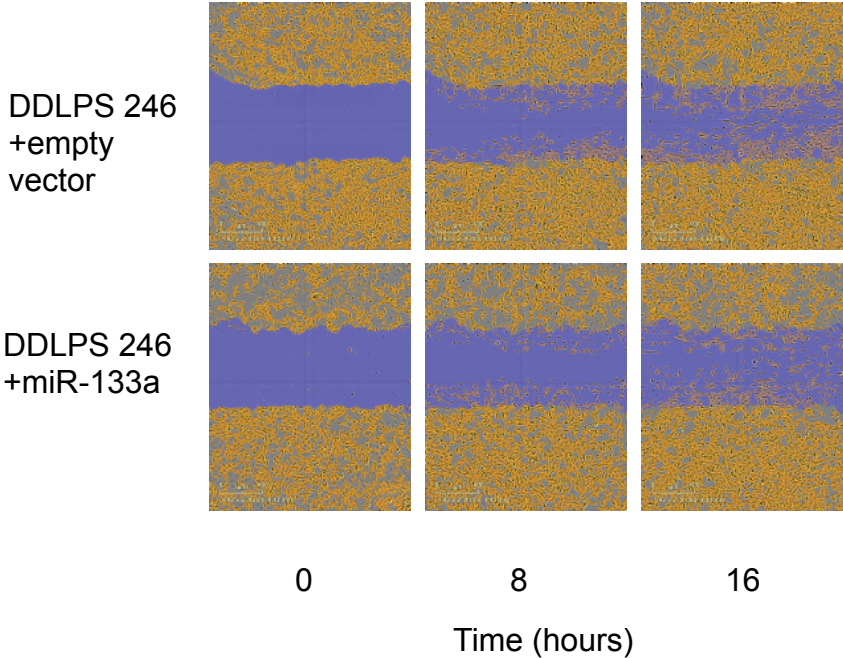

**b**

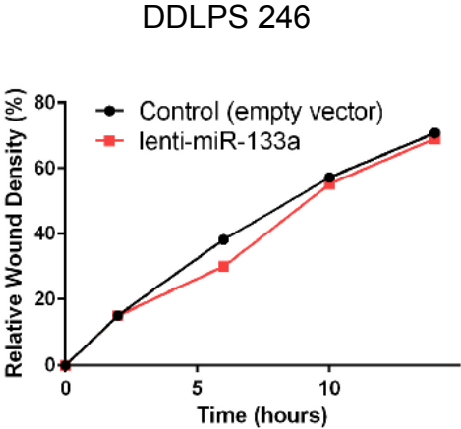

Supplement: 12935_2018_583_MOESM1_ESM.pdf [file 12935_2018_583_MOESM1_ESM.pdf]
